# Supplementary material for: Morphology-controlled synthesis of MoS2using citric acid as a complexing agent and self-assembly inducer for high electrochemical performance
Source: Royal Society of Chemistry journal article supplement (doi:10.1039/d2ra05351a), 2022-01-01
Supplement: d2ra05351a1.pdf [file d2ra05351a1.pdf]

## Supporting Information

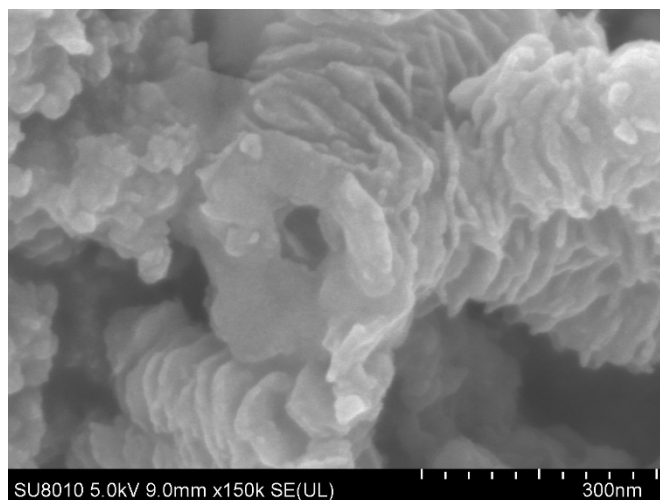

Fig.S1 SEM image of MoS<sub>2</sub>-CA(0.02) with hole

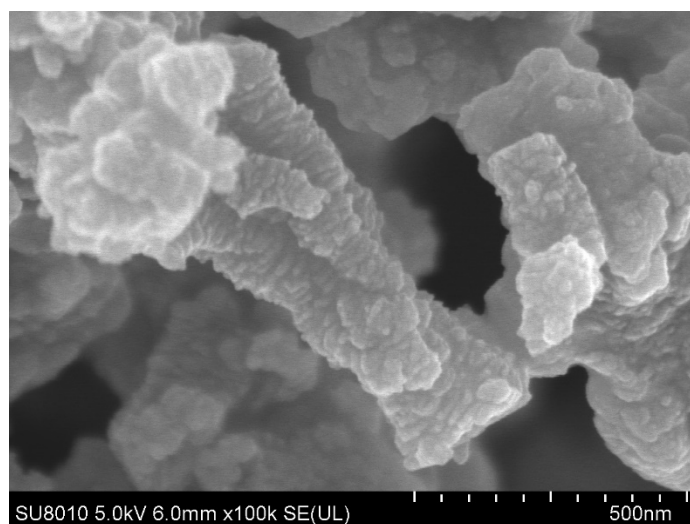

Fig.S2 SEM image of MoS<sub>2</sub>-CA(0.03)

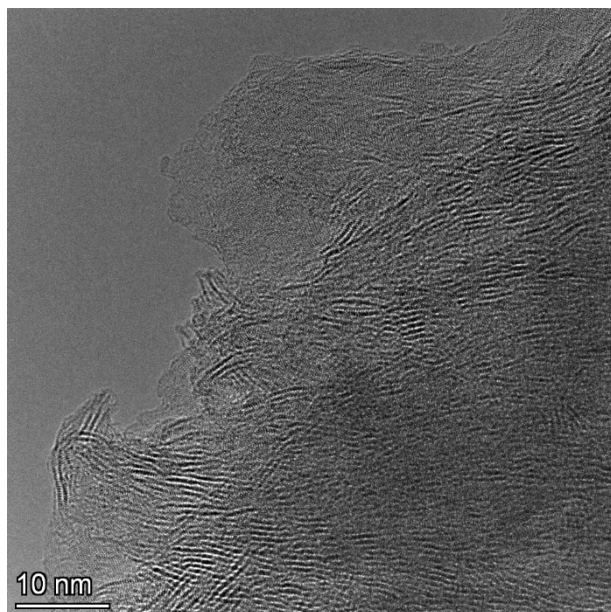

Fig.S3 TEM image of MoS<sub>2</sub>-CA(0.02)
